# Supplementary material for: Pathogen-specific deep sequence-coupled biopanning: A method for surveying human antibody responses
Source: PubMed Central journal article supplement (PMC5289605; doi:10.1371/journal.pone.0171511), 2017-02-02
Supplement: pone.0171511.s001.pdf [file pone.0171511.s001.pdf]

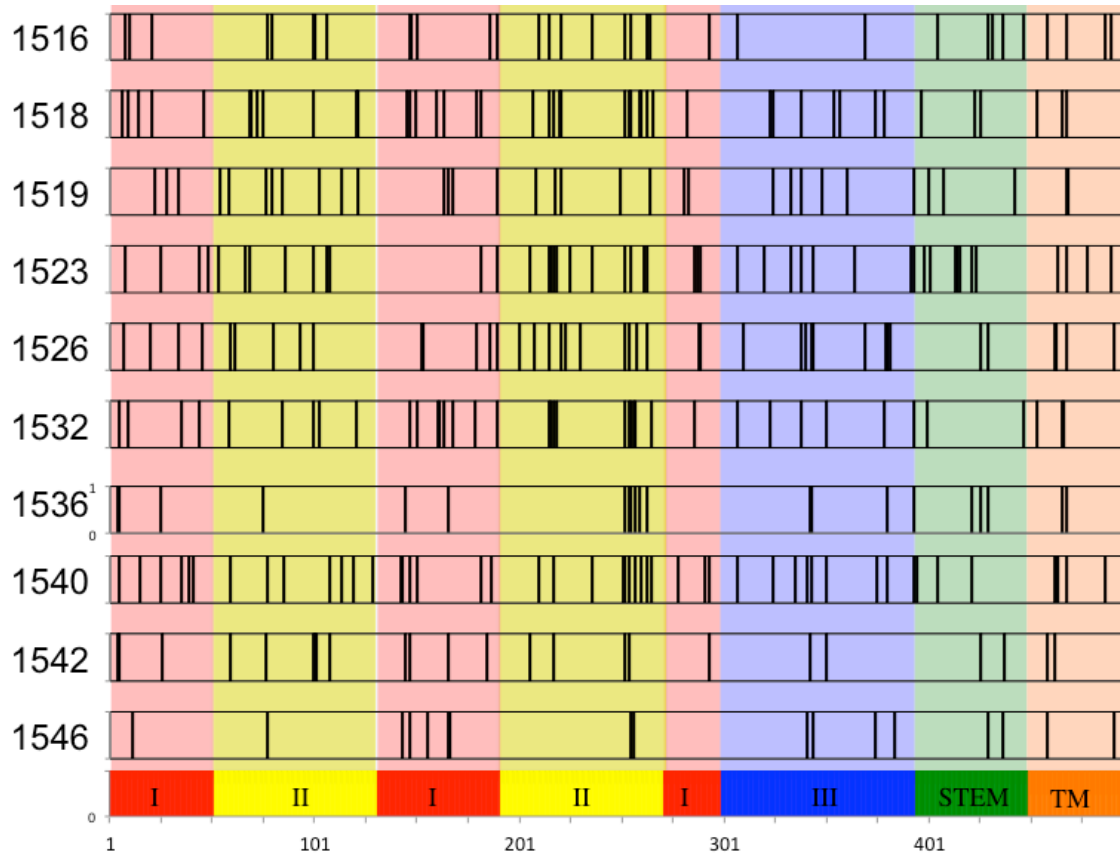

**S1 Figure. E-associated peptides identified for each DENV secondary infection patients.** Deep sequence-coupled biopanning results are plotted showing peptides (black lines) that were enriched 10-fold or more for each patient. Shading indicates the associated domain of E.
